# Supplementary material for: Risk Factors and Spatial Clusters of Cryptosporidium Infection among School-Age Children in a Rural Region of Eastern China
Source: Int J Environ Res Public Health. 2018 May 6;15(5):924. doi: 10.3390/ijerph15050924 (PMC5981963; doi:10.3390/ijerph15050924)
Supplement: Supplementary file 1 [file ijerph-15-00924-s001.pdf]

# Supplementary Materials: Risk Factors and Spatial Clusters of Cryptosporidium Infection among School-Age Children in a Rural Region of Eastern China

Hao Zheng, Jianfeng He, Li Wang, Rong Zhang, Zhen Ding and Wenbiao Hu

**Table S1.** Details of questionnaire in the study.

| Variables                                           | Options              |
|-----------------------------------------------------|----------------------|
| <i>Demographic variables</i>                        |                      |
| Name                                                |                      |
| Gender                                              | 1. Male<br>2. Female |
| Age                                                 |                      |
| Address                                             |                      |
| <i>Environmental variables</i>                      |                      |
| Supplied with piped water                           | 1. Yes<br>2. No      |
| Presence of toilets at household                    | 1. Yes<br>2. No      |
| Raising livestock or poultry                        | 1. Yes<br>2. No      |
| <i>Personal characteristics</i>                     |                      |
| Contact with pets (e.g., dog, cat)                  | 1. Yes<br>2. No      |
| Boiling water before drinking                       | 1. Yes<br>2. No      |
| Swimming in one month                               | 1. Yes<br>2. No      |
| Travelling in six months                            | 1. Yes<br>2. No      |
| Contact with water facilities in one month          | 1. Yes<br>2. No      |
| Contact with a person with diarrhea in three months | 1. Yes<br>2. No      |
| Washing hands before eating and after defecation    | 1. Yes<br>2. No      |
| Symptoms (e.g., diarrhea, nausea)                   | 1. Yes<br>2. No      |

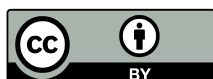

© 2018 by the authors. Licensee MDPI, Basel, Switzerland. This article is an open access article distributed under the terms and conditions of the Creative Commons Attribution (CC BY) license (<http://creativecommons.org/licenses/by/4.0/>).
